# 1 Seasonal Effects of Environmental Change on Yellow-Bellied Marmot

## 2 Population Dynamics

3 Running title: Seasonal mechanisms of population dynamics

4 Authors: Maria Paniw<sup>1</sup>, Dylan Childs<sup>2</sup>, Kenneth B Armitage<sup>3</sup>, Daniel T Blumstein<sup>4,5</sup>, Julien

5 Martin<sup>6</sup>, Madan Oli<sup>7</sup>, Arpat Ozgul<sup>1</sup>

7 *1 - Department of Evolutionary Biology and Environmental Studies, University of Zurich,*

8 *Winterthurerstrasse 190, CH-8057 Zurich, Switzerland*

9 *2 - Department of Animal and Plant Sciences, University of Sheffield, Western Bank, Sheffield S10 2TN,*

10 *UK*

11 *3 - Ecology & Evolutionary Biology Department, The University of Kansas, Lawrence, KS 66045-7534,*

12 *USA*

13 *4 - Department of Ecology and Evolutionary Biology, University of California Los Angeles, Los Angeles,*

14 *CA 90095, USA*

15 *5 - The Rocky Mountain Biological Laboratory, Crested Butte, CO 81224, USA*

16 *6 - School of Biological Sciences, University of Aberdeen, Aberdeen, AB24 2TZ, UK*

17 *7 - Department of Wildlife Ecology, University of Florida, Gainesville, FL 32611, USA*

18  
19  
20 \*Corresponding author: Tel.: +34-671-246-338; email: maria.paniw@ieu.uzh.ch; ORCID ID: 0000-0002-  
21 1949-4448  
22

## 23 ABSTRACT

24 Environmental factors drive the persistence of natural populations by causing complex,  
25 covarying responses in demographic processes (*i.e.*, survival, growth, and reproduction). As  
26 most natural populations inhabit seasonal environments, overlooking seasonal differences in this  
27 covariation may obscure the mechanisms that buffer or amplify population responses to  
28 environmental change. We investigated how environment-driven covariation of seasonal  
29 demographic processes affects population dynamics using 40 years of individual-based data from  
30 a population of yellow-bellied marmots (*Marmota flaviventris*). We first used a factor-analytic

31 approach to jointly model demographic processes as a function of a latent variable describing  
32 yearly environmental quality. We then parameterized, perturbed, and projected into the future a  
33 seasonal population model that explicitly incorporated the covarying demographic responses to  
34 the environment. The projections were based on various scenarios of environmental change,  
35 including changes in the trend and temporal patterning of environmental quality. We show that,  
36 although demographic processes in both the summer and winter season contributed to population  
37 fitness, yearly environmental quality exerted the strongest effect on winter demography only.  
38 Simultaneous, negative responses to declining average environmental quality of winter survival  
39 and mass and reproductive-status change resulted in an increased risk of population quasi-  
40 extinction, regardless of summer demography. We emphasize that assessing seasonal  
41 demographic effects is key to understanding population persistence in the face of environmental  
42 change and should receive much more attention in ecological theory and conservation  
43 management.

#### 44 **INTRODUCTION**

45 Effects of environmental change on survival, growth, and reproduction are typically investigated  
46 based on annual transitions among life-history stages in structured population models (Paniw,  
47 Ozgul, & Salguero-Gómez, 2018; Salguero-Gómez et al., 2016). However, all natural  
48 ecosystems show some level of seasonal fluctuations in environmental conditions, and numerous  
49 species have evolved life cycles that are cued to such seasonality (Ruf, Bieber, Arnold, &  
50 Millesi, 2012; Varpe, 2017). For example, most temperate- and many arid-environment species  
51 show strong differences in survival and growth among seasons, with reproduction being confined  
52 mostly to one season (Childs, Coulson, Pemberton, Clutton-Brock, & Rees, 2011; Rushing et al.,  
53 2017; Woodroffe, Groom, & McNutt, 2017). Species with highly adapted, seasonal life cycles

54 are likely to be particularly vulnerable to environmental change, even if they are relatively long-  
55 lived (Campos et al., 2017; Jenouvrier et al., 2012; Paniw, Maag, Cozzi, Clutton-Brock, &  
56 Ozgul, 2019). This is because adverse environmental conditions in one season may carry-over to  
57 the next season in which key life-history events (e.g., reproduction) occur, and can negate  
58 positive season-specific environmental effects (Marra, Cohen, Loss, Rutter, & Tonra, 2015). For  
59 instance, in species where individual traits such as body mass determine demographic rates,  
60 environment-driven changes in the trait distribution in one season can affect trait-dependent  
61 demographic rates in the next season (Bassar, Letcher, Nislow, & Whiteley, 2016; Paniw et al.,  
62 2019). Investigating annual dynamics, averaged over multiple seasons, may, therefore, obscure  
63 the mechanisms that allow populations to persist under environmental change.

64         Despite the potential to gain a more mechanistic view of population dynamics, modeling  
65 the effects of seasonal environmental change is an analytically complex and data-hungry  
66 endeavor (Bassar et al., 2016; Benton, Plaistow, & Coulson, 2006). This is in part because  
67 multiple environmental factors that change throughout the year can interact with each other and  
68 individual-level (e.g., body mass) or population-level factors (e.g., density dependence) to  
69 influence demographic rates (Benton et al., 2006; Lawson, Vindenes, Bailey, & van de Pol,  
70 2015; Ozgul, Oli, Olson, Blumstein, & Armitage, 2007; Paniw et al., 2019; Töpper et al., 2018).  
71 One major analytical challenge for population ecologists is that typically only a small subset of  
72 potential environmental drivers of population dynamics are known and measured (Ehrlén,  
73 Morris, von Euler, & Dahlgren, 2016; Teller, Adler, Edwards, Hooker, & Ellner, 2016). Another  
74 challenge is that key environmental factors simultaneously affect multiple demographic rates  
75 causing them to covary within and among seasons (Maldonado-Chaparro, Blumstein, Armitage,  
76 & Childs, 2018; Paniw et al., 2019). Positive environment-driven covariation in demographic

77 rates can then amplify the population-level effects of environmental change (Jongejans, de  
78 Kroon, Tuljapurkar, & Shea, 2010; Robert, Bolton, Jiguet, & Bried, 2015). Antagonistic  
79 demographic responses on the other hand can buffer populations from environmental change  
80 (Knops, Koenig, & Carmen, 2007; Van de Pol et al., 2010); for instance, when population-level  
81 effects of decreased reproduction are offset by increases in survival or growth (Connell &  
82 Ghedini, 2015; Reed, Grøtan, Jenouvrier, Sæther, & Visser, 2013; Villellas, Doak, García, &  
83 Morris, 2015). Thus, explicit consideration of environment-driven patterns in demographic  
84 covariation can allow to gain a fuller picture of population persistence in a changing world. Such  
85 a consideration remains scarce (Ehrlén & Morris, 2015; Ehrlén et al., 2016) but see (Bassar et al.,  
86 2016; Compagnoni et al., 2016).

87         A flexible framework to model population responses to environment-driven demographic  
88 covariation are integral projection models (IPMs; Ellner, Childs, & Rees, 2016). Seasonal IPMs  
89 are an extension of periodic matrix population models (Caswell, 2001, ch. 13 and references  
90 therein) (Ripley & Caswell, 2006), and simultaneously project trait distributions and population  
91 dynamics across seasons. The construction of IPMs is typically done by fitting simple models  
92 describing demographic rates as functions of a continuous state variable (e.g., body mass) and  
93 (environmental) covariates. Thus, this framework can integrate demographic covariation in  
94 response to environmental drivers (Hindle et al., 2018; Merow et al., 2014; Rees & Ellner, 2009).  
95 IPMs are increasingly used to project population dynamics under environmental change (Paniw  
96 et al., 2019; Paniw, Quintana-Ascencio, Ojeda, & Salguero-Gómez, 2017b; Simmonds &  
97 Coulson, 2015); however, periodic IPMs have been developed in only a few cases (Bassar et al.,  
98 2016; Paniw et al., 2019), despite their potential to provide a mechanistic understanding of

99 seasonal carry-over effects (Harrison, Blount, Inger, Norris, & Bearhop, 2010; Hostetler, Sillett,  
100 & Marra, 2015).

101 Here, we investigated the population-level effects of environment-driven seasonal  
102 covariation among trait-mediated demographic rates (*i.e.*, collectively referred to as demographic  
103 processes), capitalizing on 40 years (1976-2016) of individual-based data from a population of  
104 yellow-bellied marmots (*Marmota flaviventris*). Yellow-bellied marmots have adapted to a highly  
105 seasonal environment; individuals spend approximately eight months in hibernation during the  
106 cold winter (September/October-April/May), and use the short summer season (April/May-  
107 September/October) to reproduce and replenish fat reserves (Fig. 1). One challenge that the  
108 marmot study shares with numerous other natural systems is the identification of key proximal  
109 environmental factors driving population dynamics. In marmots such factors are numerous and  
110 affect population dynamics through complex, interactive pathways (Maldonado-Chaparro, Read,  
111 & Blumstein, 2017; Oli & Armitage, 2004), which include interactions with phenotypic-trait  
112 structure (Ozgul, Childs, Oli, Armitage, & Blumstein, 2010). As a result, measures of  
113 environmental covariates (e.g., temperature) have previously shown little effect on the  
114 covariation of marmot demographic processes (Maldonado-Chaparro et al., 2018). To address  
115 this challenge, we used a novel method, a hierarchical factor analysis (Hindle et al., 2018), to  
116 model the covariation of demographic processes as a function of a shared measure of latent  
117 environmental quality (*i.e.*, environmental condition at a given time point), quantified in a  
118 Bayesian modeling framework. We then built seasonal stage-, mass-, and environment-specific  
119 IPMs for the marmot population and used prospective stochastic perturbation analyses and  
120 population projections to assess how environmental change may affect population dynamics via  
121 the observed demographic covariation.

## 122 **METHODS**

### 123 *Study species*

124 Yellow-bellied marmots are large, diurnal, burrow-dwelling rodents, occupying montane regions  
125 of the western North America (Armitage, 2003; Frase & Hoffmann, 1980). They experience  
126 strong seasonal fluctuations in environmental conditions (Armitage, 2014). The biology of  
127 yellow-bellied marmots in Colorado is described in detail by Armitage (2014). Our study was  
128 conducted in the Upper East River Valley near the Rocky Mountain Biological Laboratory,  
129 Gothic, Colorado (38° 57' N, 106° 59' W). Climatic conditions in both winter and summer have  
130 been shown to influence reproduction and survival in the subsequent season (Lenihan & Van  
131 Vuren, 1996; Van Vuren & Armitage, 1991). These climatic effects on the demography of  
132 yellow-bellied marmots are mediated through body mass, with heavier individuals more likely to  
133 survive hibernation and reproduce in summer (Armitage, Downhower, & Svendsen, 1976; Ozgul  
134 et al., 2010). Population dynamics of marmots are therefore likely to be susceptible to changes in  
135 seasonal patterns of environmental drivers. However, numerous interacting climatic factors, such  
136 as temperature extremes, snowfall, and length of snow cover, determine both winter and summer  
137 environmental conditions, and their effect on marmot demography have been shown to be  
138 difficult to disentangle (Inouye, Barr, Armitage, & Inouye, 2000; Schwartz & Armitage, 2002;  
139 Schwartz & Armitage, 2005).

140

### 141 *Seasonal demographic rates and trait transitions*

142 For this study, we focused on the population dynamics of eight major colonies continuously  
143 monitored since 1976 (Armitage, 2014; Supporting Material S1). Each year, marmots were live-  
144 trapped throughout the growing season in summer (and ear-tagged upon first capture), and their

145 sex, age, mass, and reproductive status were recorded (Armitage & Downhower, 1974;  
 146 Schwartz, Armitage, & Van Vuren, 1998). We focused on seasonal demographic processes of  
 147 females only. All young males disperse from their natal colonies, and female immigration into  
 148 existing colonies is extremely rare; as such, local demography can be accurately represented by  
 149 the female segment of the population (Armitage, 2010). We classified female marmots by age  
 150 and reproductive status: juveniles (< 1 year old), yearlings (1 year old), and non-reproductive  
 151 2 years old; not observed pregnant or with offspring) and reproductive adults ( $\geq 2$  years old;  
 152 observed pregnant or with offspring) (Armitage & Downhower, 1974).

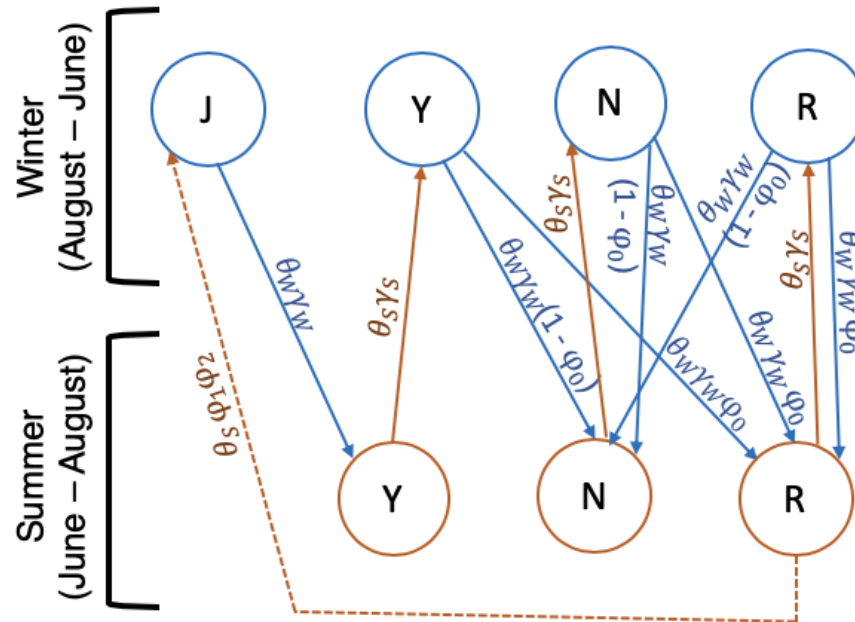

153  
 154 **Figure 1:** Seasonal life-cycle transitions modelled for yellow-bellied marmots. The two seasons correspond to the  
 155 main periods of mass loss (winter) and gain (summer). Solid and dashed arrows represent discrete-time stage  
 156 transitions and recruitment, respectively. Transitions among winter (W) and summer (S) stages (marked by arrows  
 157 in different colors) depend on demographic rates (survival [ $\theta$ ], reproduction [ $\phi$ ], and recruitment [ $\phi_1$ ]) and trait  
 158 transitions (mass change [ $\gamma$ ], and offspring mass [ $\phi_2$ ]). Stages are: juveniles, J, yearlings, Y, non-reproductive  
 159 adults, N, and reproductive adults, R. All stage-specific demographic rates and trait transitions are modeled using  
 160 generalized mixed effects models in a Bayesian framework and include body mass and a common latent variable  
 161 representing environmental quality as covariates.

162

163 We determined all demographic rates of females (survival, reproduction, and recruitment) for  
164 two discrete growing seasons: winter (August - June) and summer (June - August) (Fig. 1).  
165 Although marmots begin emerging from hibernation in April and some do not hibernate until  
166 October (Armitage, 2014), the two seasons delineate the main periods of mass loss and gain,  
167 respectively (Maldonado-Chaparro et al., 2017). We assumed that females that permanently  
168 disappeared from a colony had died. This measure of apparent survival may overestimate the  
169 death of yearlings in the summer, which disperse from their natal colonies (Van Vuren &  
170 Armitage, 1994). At the same time, the intensive trapping protocol ensured a high capture  
171 probability of yearlings (Oli & Armitage, 2004), decreasing the discrepancies between their  
172 apparent and true survival.

173 Female marmots give birth to one litter from mid-May to mid-June. In our population  
174 model, females  $\geq 2$  year of age that survived the winter were considered reproductive adults at  
175 the beginning of summer if they were observed to be pregnant or with pups, or non-reproductive  
176 adults otherwise (Fig. 1). Upon successful reproduction, weaned offspring emerge from burrows  
177 ca. 35 days after birth (Armitage et al., 1976); we therefore defined recruitment as the number of  
178 female juveniles weaned by reproductive females that survive the summer (Fig. 1). The sex ratio  
179 of female:male recruits was assumed to be 1:1 (Armitage & Downhower, 1974). Observations  
180 and pedigree analyses allowed to determine the mother of each new juvenile recruited into the  
181 population (Ozgul et al., 2010).

182 To assess changes in body mass from one season to the next, we estimated body mass of  
183 every female at the beginning of each season: June 1 (beginning of the summer season when  
184 marmots begin foraging) and August 15 (beginning of the winter season in our models when  
185 foraging activity decreases). Mid-August is the latest that body mass for the vast majority of



186 individuals can be measured and has been shown to be a good estimate of pre-hibernation mass  
187 (Maldonado-Chaparro et al., 2017). Body-mass estimates on the two specific dates were obtained  
188 using linear mixed effect models as described in Ozgul *et al.* (2010; see also Maldonado-  
189 Chaparro et al., 2017). Body mass of juvenile females was estimated for August 15.

190

### 191 *Modelling demographic and mass change (trait-transition) rates*

192 We jointly modeled all seasonal demographic and mass change rates (*i.e.*, demographic  
193 processes) as a function of stage and body mass - or mother's mass in the case of juvenile mass -  
194 at the beginning of a season, using a Bayesian modeling framework (Table 1; Supporting  
195 Material S1). All mass estimates were cube-root transformed to stabilize the variance and  
196 improve the normality of the residuals in the Gaussian submodels (Maldonado-Chaparro et al.,  
197 2017). We fitted all demographic-process submodels as generalized linear mixed effects models  
198 (GLMMs). We assumed a binomial error distribution (logit link function) for the probability of  
199 winter ( $\theta_w$ ) and summer ( $\theta_s$ ) survival and of probability of reproducing (*i.e.*, being in the  
200 reproductive adult stage at the beginning of summer;  $\phi_0$ ); a Poisson error distribution (log link  
201 function) for the number of recruits ( $\phi_1$ ); and a Gaussian error distribution (identity link) for the  
202 masses ( $z^*$ ) at the end of each season (Table 1). Mass-change (*i.e.*, mass gain or loss) rates ( $\gamma$ )  
203 were then defined as functions of current ( $z$ ) and next ( $z^*$ ) mass using a normal probability  
204 density function. For the juvenile mass distribution ( $\phi_2$ ), the density function depended on the  
205 mother's mass ( $z_M$ ) (see below; Supporting Material S2).

206 To describe environment-driven temporal covariation in seasonal demography in the  
207 absence of explicit knowledge on environmental drivers, we quantified a model-wide latent  
208 variable ( $Q_y$ ) affecting all demographic processes in a given year ( $y$ ) (Table 1). One latent

209 variable was enough to capture covariation among the demographic processes (Supporting  
210 Material S1). Details of the parameterization of  $Q_y$  can be found in Supporting Material S1 (see  
211 also Hindle *et al.*, 2018). Briefly, this covariate effectively estimates the overall annual  
212 environmental quality that affects the various demographic processes simultaneously, thereby  
213 capturing correlated responses (within and among seasons) to environmental fluctuations (Hindle  
214 *et al.*, 2018). In the absence of causal variables that can be directly measured,  $Q_y$  was  
215 incorporated as a covariate in all seven demographic-process submodels; and the year-specific  
216 values of  $Q_y$  were drawn from a normal distribution with mean = 0 and SD = 1. Higher  $Q_y$   
217 indicate a better quality of the environment in a given year, and the associated  $\beta_q$  slope  
218 parameters determine the magnitude and sign of the effect of  $Q_y$  on a given, season-specific  
219 demographic process (Table 1). Thus, similar to large-scale environmental indices such as NAO  
220 or ENSO,  $Q_y$  captures to what extent a bad ( $Q_y < 0$ ) or good ( $Q_y > 0$ ) environment is likely to  
221 affect both summer and winter demography. To make the Bayesian model identifiable, we  
222 constrained the standard deviation of  $Q_y$  to equal 1 and arbitrarily set the  $\beta_q$  for summer survival  
223 ( $\theta_s$ ) to be positive. The  $\beta_q$  of the remaining submodels can, therefore, be interpreted as  
224 correlations of demographic processes with  $\theta_s$  due to environmental variation.

225         Aside from the environmental covariate  $Q_y$  simultaneously affecting all demographic  
226 processes, we included a random year effect ( $\epsilon_{Ysubmodel}$ ) as a covariate in each submodel. This  
227 year effect accounted for additional temporal variation not captured by  $Q_y$ . We also tested for the  
228 effect of population density (measured as total abundance, abundance of adults, or abundance of  
229 yearling and adults) in all submodels. However, like previous studies, we could not detect any  
230 clear density effects (Armitage, 1984; Maldonado-Chaparro *et al.*, 2018).

231 The prior distributions of the Bayesian model and posterior parameter samples obtained  
 232 are detailed in Supporting Material S1. For each demographic-process submodel, we chose the  
 233 most parsimonious model structure by fitting a full model that included all covariates (mass,  
 234 stage, and  $Q_y$ ) and two-way interactions between mass and stage and stage and  $Q_y$ , and retaining  
 235 only those parameters for which the posterior distribution ( $\pm 95\%$  C.I.) did not overlap 0 (Table  
 236 1; Table S2.1).

237 **Table 1:** Parameterization of the most parsimonious models describing winter (W) and summer (S)  
 238 demographic processes in marmots. The distributions B, N, and P correspond to the Bernoulli, normal,  
 239 and Poisson distributions, respectively. The logit link, for winter survival as an example, corresponds to  $1/(1+\exp(-\theta_W))$ . *Stage* – life cycle stage. *Q* – latent environmental variable. *z* – season-specific mass.  $z_M$  – mass  
 240 of the mother.  
 241

| Demographic process                | Function                                                                                                                                                                                               | Likelihood distribution        |
|------------------------------------|--------------------------------------------------------------------------------------------------------------------------------------------------------------------------------------------------------|--------------------------------|
| <b>Winter (W):</b>                 |                                                                                                                                                                                                        |                                |
| Survival ( $\theta_W$ )            | $\text{logit}(\theta_W) = \alpha_{0\theta W} + \alpha_{a\theta W}[\text{stage}] + \beta_{z\theta W} \times z + \beta_{q\theta W} \times Q_y[\text{year}] + \varepsilon_{y\theta W}[\text{year}]$       | $\text{B}(\theta_W)$           |
| Mass next ( $z_W^*$ )              | $z_W^* = \alpha_{0z^*W} + \alpha_{az^*W}[\text{stage}] + (\beta_{zz^*W} + \beta_{zaz^*W}[\text{stage}]) \times z + \beta_{qz^*W} \times Q_y[\text{year}] + \varepsilon_{yz^*W}[\text{year}]$           | $\text{N}(z_W^*, \tau_{z^*W})$ |
| Reproduction ( $\varphi_0$ )       | $\text{logit}(\varphi_0) = \alpha_{0\varphi 0} + \alpha_{a\varphi 0}[\text{stage}] + \beta_{z\varphi 0} \times z + \beta_{q\varphi 0} \times Q_y[\text{year}] + \varepsilon_{y\varphi 0}[\text{year}]$ | $\text{B}(\varphi_0)$          |
| <b>Summer (S):</b>                 |                                                                                                                                                                                                        |                                |
| Survival ( $\theta_S$ )            | $\text{logit}(\theta_S) = \alpha_{0\theta S} + \alpha_{a\theta S}[\text{stage}] + \beta_{z\theta S} \times z + \beta_{q\theta S} \times Q_y[\text{year}] + \varepsilon_{y\theta S}[\text{year}]$       | $\text{B}(\theta_S)$           |
| Mass next ( $z_S^*$ )              | $z_S^* = \alpha_{0z^*S} + \alpha_{az^*S}[\text{stage}] + (\beta_{zz^*S} + \beta_{zaz^*S}[\text{stage}]) \times z + \beta_{qz^*S} \times Q_y[\text{year}] + \varepsilon_{yz^*S}[\text{year}]$           | $\text{N}(z_S^*, \tau_{z^*S})$ |
| Number of recruits ( $\varphi_1$ ) | $\log(\varphi_1) = \alpha_{0\varphi 1} + \beta_{z\varphi 1} \times z + \beta_{q\varphi 1} \times Q_y[\text{year}] + \varepsilon_{y\varphi 1}[\text{year}]$                                             | $\text{P}(\varphi_1)$          |
| Juvenile mass ( $z_j^*$ )          | $z_j^* = \alpha_{0z^*j} + \beta_{zz^*j} \times z_M + \beta_{qz^*j} \times Q_y[\text{year}] + \varepsilon_{yz^*j}[\text{year}]$                                                                         | $\text{N}(z_j^*, \tau_{z^*j})$ |

242

## 243 *Seasonal Integral Projection Models*

244 We used the most parsimonious models of demographic processes (Table 1) to parameterize  
245 density-independent, stage-mass-structured, seasonal and environment-specific Integral  
246 Projection Models (IPMs) (Easterling, Ellner, & Dixon, 2000; Ellner et al., 2016). For each stage  
247  $a$ , the IPMs track the number of individuals ( $n_a$ ) in the mass range  $[z, z+dz]$  at time  $t$ . The fate of  
248 these individuals at time  $t+1$  is described by a set of coupled integral equations, which differ for  
249 each season and are a function of the latent environmental variable  $Q_y$ . In the winter season,  
250 individuals can survive ( $\theta_w$ ) and change mass ( $\gamma_w$ ) according to their stage, mass, and  
251 environment. Conditional on survival, juveniles (J) transition to yearlings (Y), while all other  
252 stages are distributed to either the reproductive (R) or non-reproductive (N) adult stage at the  
253 beginning of summer, depending on the stage-specific probability of reproducing ( $\phi_0$ ). During  
254 the summer season, individuals in stages Y, N, and R survive ( $\theta_s$ ) and change mass ( $\gamma_s$ )  
255 according to their stage and mass at the beginning of summer and according to the environment;  
256 but, in summer, transitions to another stage do not occur. Reproductive individuals (R) of a given  
257 mass also produce  $\phi_1/2$  female juveniles (J), *i.e.*, half of the total number of recruits. Female  
258 recruits are distributed across  $z$  mass classes by the end of summer, given by  $\phi_2$ . The  
259 mathematical descriptions of the IPMs for the winter and summer seasons are provided in  
260 Supporting Material S2.

261 We numerically integrated the summer and winter IPMs using the ‘midpoint rule’  
262 (Easterling et al., 2000) with upper and lower integration limits of 7.8 (472 g) and 17.1 (5000 g),  
263 respectively. To avoid unintended eviction of individuals from the model (*i.e.*, for a given mass  
264 class  $z$ , the sum of the probabilities to transition to  $z^* < 1$ ), we applied a constant correction (*i.e.*,  
265 equally redistributing evicted individuals among all  $z^*$ ) when constructing the IPMs as suggested

266 in Merow *et al.*, (2014) (see also Williams, Miller, & Ellner, 2012). For each stage-specific IPM,  
267 we chose a bin size of 100 (*i.e.*, dividing masses into 100 classes), as further increasing the bin  
268 size did not significantly improve the precision of estimates of the long-term population growth  
269 rate. The IPMs we constructed accurately reproduced observed population dynamics from 1976-  
270 2016 (Supporting Material S2).

271

272 *Sensitivity of population dynamics to seasonal demographic processes: prospective*  
273 *perturbations*

274 Changes in population dynamics in response to changes in environmental fluctuations are  
275 determined by the response of demographic processes to the environment and, in turn, of  
276 population dynamics to demographic processes (Maldonado-Chaparro *et al.*, 2018). To explore  
277 these two sources of variation in the long-term fitness of the marmot population, we first  
278 quantified the proportional change in the demographic processes (Table 1) to changes in  $Q_y$ , *i.e.*,  
279  $\partial(\log \rho)/\partial Q_y$ , where  $\rho$  is a demographic process. We calculated these elasticities for different  
280 values of  $Q_y$  (from -1 to 1), increasing each value by 0.01 and keeping mass at its stage-specific  
281 average and  $\varepsilon_Y$  fixed to the value estimated for 2015. To assess the effect of parameter  
282 uncertainty on our estimates, we repeated these calculations for a sample of 1000 parameter  
283 values drawn from the posterior distribution (Paniw, Quintana-Ascencio, Ojeda, & Salguero-  
284 Gómez, 2017a).

285 We next assessed which demographic processes most affected the stochastic population  
286 fitness under observed (1976-2016) environmental fluctuations. We used a simulation of 100,000  
287 years to assess asymptotic, long-term stochastic population dynamics (see section below for  
288 short-term viability simulations). Each simulation started with the population of individuals with

289 the standing stage and mass distribution at the beginning of the winter season in 2016. At each  
290 run of the simulation, a seasonal IPM was constructed with resampled, year-specific  $Q_y$  and  $\varepsilon_Y$   
291 values. We then calculated the periodic IPM product of the winter and summer IPMs, describing  
292 the demographic and trait transitions from the beginning of one winter season to the next  
293 (Caswell, 2001; chapter 13). Lastly, we obtained the stochastic population growth rate,  $\log \lambda_S$ , (a  
294 measure of fitness) as the mean of the logs of annual realized population growth rates,  $\lambda = n_{t+1}/n_t$ ,  
295 where  $n_t$  and  $n_{t+1}$  are the total number of individuals in the population at time (year)  $t$  and  $t+1$ ,  
296 respectively.

297 During the simulations, we adapted the approach described in Ellner *et al.* (2016; chapter  
298 7) to calculate the elasticity of  $\log \lambda_S$  to changes in the mean ( $e_S^\mu$ ) and standard deviation ( $e_S^\sigma$ ) of  
299 stage-specific demographic processes  $\rho$ , e.g., juvenile survival. To do so, we perturbed a  
300 demographic-process function for a given stage over an interval of masses  $[z, z+dz]$  by its mean  
301 and standard deviation obtained across 40 years of observed dynamics (Supporting Material S3).  
302 Observed dynamics were obtained by resampling year-specific values of  $Q_y$  and  $\varepsilon_Y$  for 1976-  
303 2016 from the Bayesian model. We then built a winter or summer IPM using the perturbed vital  
304 rate and obtained a new, perturbed periodic IPM product (*i.e.*, the perturbation kernel). Lastly,  
305 we integrated this product into eq. 7.5.2 in Ellner *et al.* (2016) in order to estimate  $e_S^\mu$  and  
306  $e_S^\sigma$  from the simulations of population dynamics for  $T = 90,000$  years (*i.e.*, discarding the first 10,  
307 000 years of simulations to ensure no effect of transient population fluctuations):

$$308 \quad e = E \left[ \frac{\langle v_{t+1}, C_t w_t \rangle}{\langle v_{t+1}, K_t w_t \rangle} \right],$$

309 where  $C_t$  is the perturbation kernel,  $K_t$  is the unperturbed annual IPM kernel at each simulation  
310 iteration  $t$ ,  $v$  and  $w$  are the left and right eigenvectors associated with  $K$  at  $t+1$  and  $t$ , respectively.  
311 For instance, if average winter survival in a given mass interval (*i.e.*, IPM bin) for reproductive

312 individuals from 1976-2016 was 0.95, each winter IPM during T simulations was perturbed by  
313 subtracting a focal value of winter survival from its 40-year mean; and  $e_s^\mu$  was calculated by  
314 integrating this perturbed IPM as  $C_t$  into the above equation. The two elasticities quantify the  
315 strength of selection pressures on lower-level vital rates in stochastic environments (Haridas &  
316 Tuljapurkar, 2005; Rees & Ellner, 2009). We repeated the elasticity calculations for a sample of  
317 100 parameter values from the posterior distribution.

318

### 319 *Population viability under changes in environmental quality*

320 To assess how the combined effects of (i) seasonal demographic responses to environmental  
321 fluctuations and (ii) population sensitivity to seasonal demography impact population viability,  
322 we simulated population dynamics under environmental change. We ran 200 independent  
323 simulations each projecting population dynamics for 50 years. The projections were based on  
324 several scenarios of changes in the distribution of environmental quality,  $Q_y$ . We first created  
325 base simulations (*i.e.*, no environmental change) where  $Q_y$  was picked from a normal distribution  
326 with  $\mu_Q = 0$  and  $\sigma_Q = 1$  across all demographic processes. Next, we approximated random future  
327 fluctuations in  $Q_y$  under different average environmental conditions. To do so, we sampled  $Q_y$   
328 from a normal distribution fixing the average environmental quality ( $\mu_Q = -1, -0.5, 0.5, 1$ ) and its  
329 variation ( $\sigma_Q = 0.6, 1.2$ ) over the 50 years of projections. We then explored how a trend in  $\mu_Q$   
330 would affect viability and mass distribution. To do so, we decreased the four  $\mu_Q$  by 0.01 in each  
331 year of the projections, keeping  $\sigma_Q$  unaltered. Lastly, as temporal autocorrelation in  
332 environmental states can affect population dynamics (Paniw et al., 2018), we projected  
333 autocorrelated changes in  $Q_y$ . That is, each year, marmots could experience either a good or bad  
334 environment where  $Q_y$  was sampled from a normal distribution with either  $\mu_Q = 1$  or  $\mu_Q = -1$ ,

335 respectively ( $\sigma_Q$  was fixed at 0.6). The sequence of good and bad environments was determined  
336 by a Markov chain with various autocorrelation coefficients (see Supporting Material S4 for  
337 details). All simulations were repeated for a random sample of 1,000 parameters from the  
338 posterior distribution to account for parameter uncertainty.

339 For all environmental-change scenarios, we recorded the probability of quasi-extinction  
340 across the 200 simulations. Quasi-extinction was defined conservatively as the number of non-  
341 juvenile individuals (*i.e.*, yearlings and non-reproductive and reproductive individuals) in the  
342 population to be  $< 4$ , which corresponded to 10 % of their lowest observed number.

## 343 RESULTS

### 344 *Seasonal environment-driven covariation in demographic processes*

345 Our GLMMs showed a strong effect of environmental quality (measured by the latent variable  
346  $Q_y$ ) on winter but not summer demographic processes. This effect was positive for all winter  
347 demographic processes, as evidenced by the positive  $\beta_q$  (Fig. S1.3 in Supporting Material S1).  
348 The  $\beta_q$  for demographic processes in the summer, however, were comparatively small and were  
349 not significantly different from 0 (95 % posterior C.I.s overlapped 0). This environment-driven  
350 positive covariation in demographic processes therefore indicated that  $Q_y$  provided a measure of  
351 environmental quality (Hindle et al., 2018) that did not correlate with any single environmental  
352 variable measured at the study site and correlated well with observed annual changes in  
353 population size (Supporting Material S1).

354 In accordance with the posterior distribution of  $\beta_q$  parameters, only winter demographic  
355 processes were significantly affected by small changes in  $Q_y$  (Fig. 2). Among the winter  
356 demographic processes, changes in  $Q_y$  affected reproduction across stages the most, followed by  
357 survival of juveniles (Fig. 2).



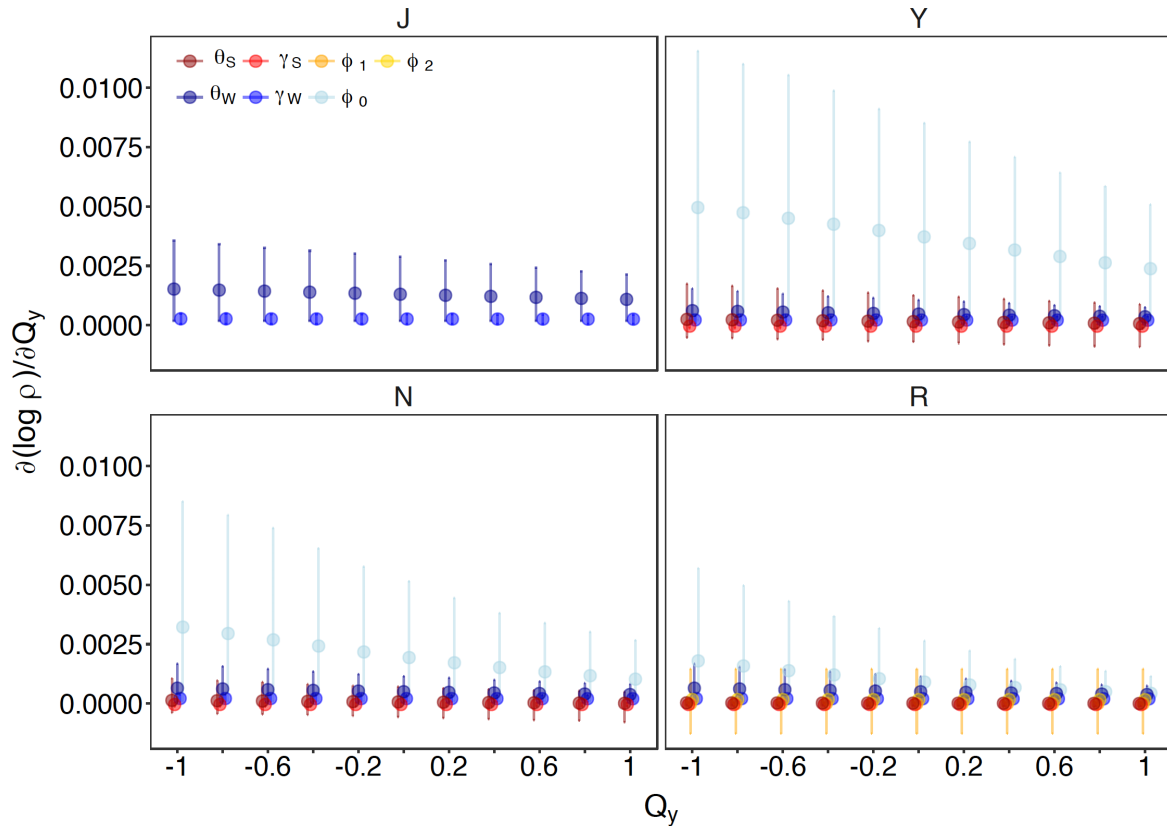

358

359 **Figure 2:** The sensitivity of seasonal demographic processes to environmental quality in marmots. Sensitivity is  
 360 assessed as proportional changes in demographic processes,  $\rho$ , as environmental quality,  $Q_y$ , increases slightly. This  
 361 sensitivity is measured with respect to different average values of  $Q_y$  and across four different life-cycle stages:  
 362 juveniles (J), yearlings (Y), non-reproductive adults (N), and reproductive adults (R). The demographic processes  
 363 include winter (W; blue color tones) and summer (S; red color tones) survival ( $\theta$ ) and mass change ( $\gamma$ ); and  
 364 probability of reproducing ( $\phi_0$ ), recruitment ( $\phi_1$ ), and juvenile mass ( $\phi_2$ ). Points and error bars show averages  $\pm$  95  
 365 % C.I. across 1,000 posterior parameter samples obtained from the Bayesian population model.

366

367 Aside from the effects of environmental quality, our models confirmed previous findings  
 368 on the importance of body mass and stage on yellow-bellied marmot demography (Maldonado-  
 369 Chaparro et al., 2017; Ozgul et al., 2010; Ozgul, Oli, & Armitage, 2009). The most parsimonious  
 370 GLMMs (Table 1; Table S1.1 in Supporting Material S1) showed a positive effect of mass on all  
 371 demographic processes, with the weakest effect of mass on summer survival ( $\theta_s$ ) of reproductive

372 adults. Survival, in particular  $\theta_s$ , was highest for reproductive adults; reproduction was also  
 373 highest for adults that reproduced before (Fig. S1.3 in Supporting Material S1).

374

375 *Sensitivity of population dynamics to seasonal demographic processes*

376 While environmental quality affected winter demographic processes only, our prospective  
 377 perturbation analyses showed that winter and summer demography equally determine long-term  
 378 population fitness. Stochastic elasticity analyses ( $e_S^\mu$  and  $e_S^\sigma$ ) showed that relative increases in the  
 379 mean ( $\mu$ ) of winter ( $\theta_w$ ) and summer ( $\theta_s$ ) survival for reproductive adults (R), would lead to  
 380 substantial relative increases of the stochastic population growth rate,  $\log\lambda_s$  (Fig. 3a). Highest  $e_S^\mu$   
 381 were found at intermediate and large mass classes;  $e_S^\mu$  was negative for small masses when mass  
 382 changes ( $\gamma$ ) and offspring mass ( $\phi_2$ ) were perturbed (Fig. S3.1a in Supporting Material S3),  
 383 explaining the overall small  $e_S^\mu$  for  $\gamma$  and  $\phi_2$  summed over all mass classes (Fig. 3a). Overall,  
 384 relative changes in  $\log\lambda_s$  due to increases in the standard deviation of demographic processes  
 385 ( $e_S^\sigma$ ) were much smaller compared to  $e_S^\mu$  (Fig. 3b) and didn't differ significantly between vital  
 386 rates, as 95 % posterior C.I. crossed 0 (Fig. S3.1b).

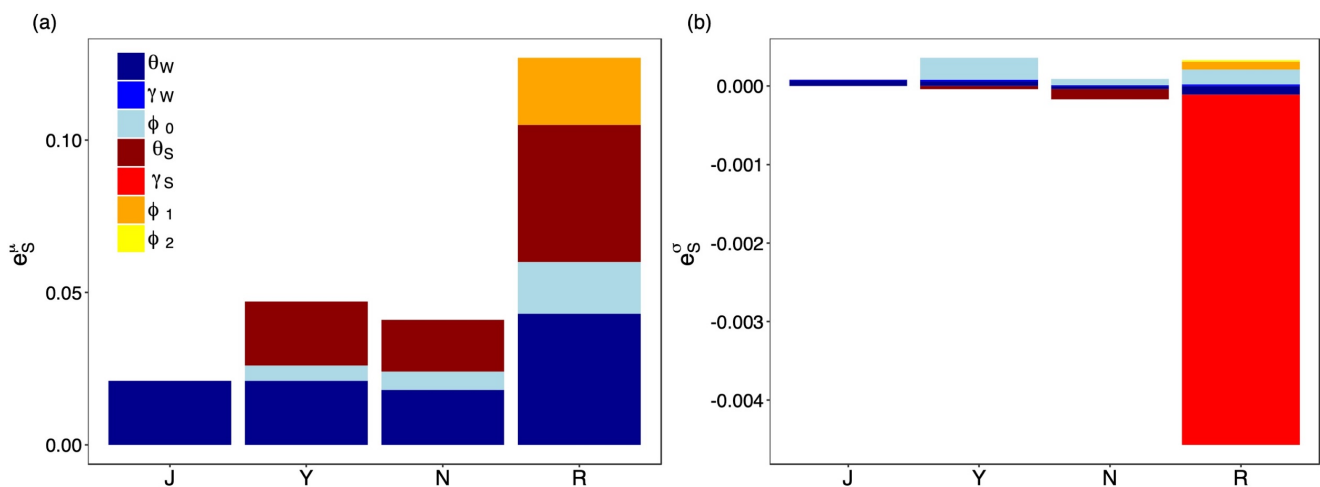

387

388 **Figure 3** Sensitivity of the average long-term population fitness to changes in the average and variability of  
389 demographic processes modeled for the yellow-bellied marmots. The sensitivity measure is obtained analytically as  
390 elasticities ( $e$ ) of the stochastic population growth rate,  $\log \lambda_s$ , to changes in (a) the mean ( $\mu$ ) and (b) standard  
391 deviation ( $\sigma$ ) of stage-specific demographic processes summed over all mass classes. Stages are juveniles (J),  
392 yearlings (Y), non-reproductive adults (N), and reproductive adults (R). Demographic processes include winter (W)  
393 and summer (S) survival ( $\theta$ ) and mass change ( $\gamma$ ); reproduction ( $\phi_0$ ); recruitment ( $\phi_1$ ), and offspring mass  
394 distribution ( $\phi_2$ ). Elasticities were calculated at the mean posterior values of parameters obtained from the Bayesian  
395 demographic model.

396

### 397 *Population viability under changes in environmental quality*

398 While population fitness was equally sensitive to demographic processes over winter and  
399 summer, environmental fluctuations strongly affected viability through winter demography.  
400 Using base simulations (*i.e.*, obtaining  $Q_y$  from a normal distribution with  $\mu_Q = 0$  and  $\sigma_Q = 1$ ),  
401 the probability of quasi-extinction, at an average of 0.1 [0.0, 0.3 C.I.] across posterior  
402 parameters, were relatively low. Simulations of population dynamics based on scenarios of  
403 environmental change resulted in substantial decreases (0 at  $\mu_Q = 1$ ) and increases (0.9 [0.6, 1.0  
404 C.I.] at  $\mu_Q = -1$ ) in quasi-extinction, compared to base simulations, when the population  
405 experienced a high and low average environmental quality ( $Q_y$ ), respectively (Fig. 4). Average  
406 quasi-extinction further increased and its uncertainty across posterior parameters decreased when  
407 a declining trend in average environmental quality ( $Q_y$ ) was simulated (Fig. S4.1). Changes in  
408 the standard deviation of  $Q_y$  had comparatively little effect on quasi-extinction (Fig. 4). The  
409 same was true for simulations of autocorrelated environmental fluctuations, where changes in the  
410 frequency of good environmental conditions (effectively changing the average environmental  
411 quality) had a strong effect on viability, while changes in the patterning of environmental states  
412 had little effect (Supporting Material S4).

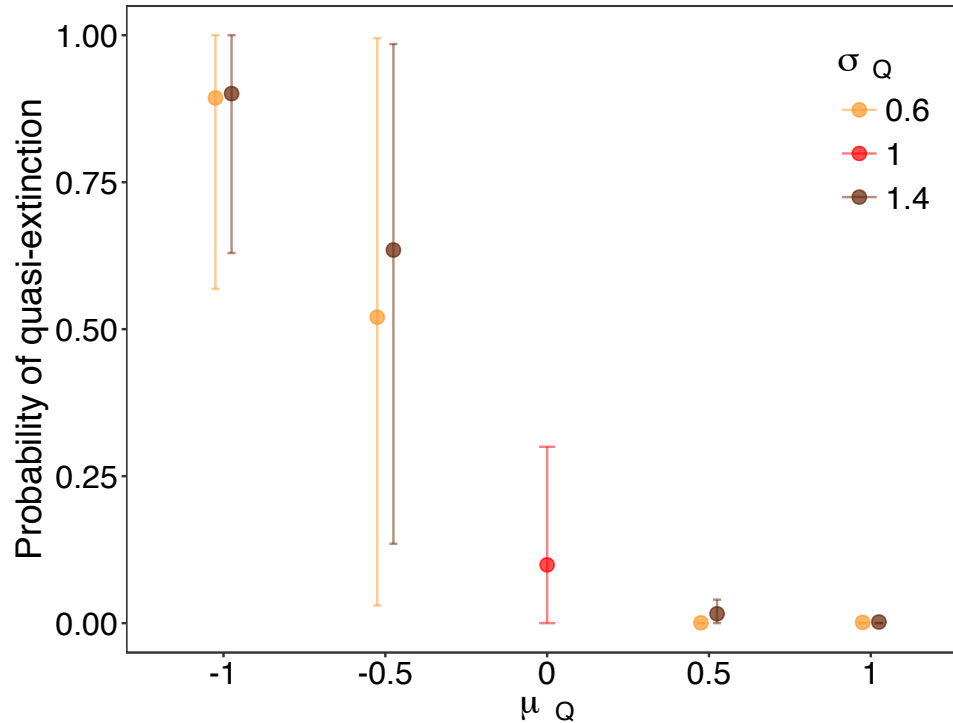

413  
414 **Figure 4:** Probability of quasi-extinction (*i.e.*, < 4 non-juveniles in the population) of yellow-bellied marmots under  
415 different scenarios of environmental change. The scenarios consisted of projecting population dynamics for 50 years  
416 fixing a different mean ( $\mu$ ) and standard deviation ( $\sigma$ ) of environmental quality ( $Q$ ) in all demographic processes.  
417 Points and error bars show averages  $\pm$  95 % C.I. across 1,000 posterior parameter samples obtained from the  
418 Bayesian population model. Base simulations ( $\mu_Q = 0$ ;  $\sigma_Q = 1$ ) are depicted in red.

419

## 420 DISCUSSION

421 One important pathway through which environmental change can act on population dynamics is  
422 through seasonal direct and carry-over effects on survival, growth, and reproduction (Harrison et  
423 al., 2010; Paniw et al., 2019). Using a novel, factor-analytic approach to quantify environment-  
424 demography relationships, we show that positive responses in several demographic processes to  
425 winter environmental conditions can drive annual population dynamics in a winter-adapted  
426 mammal. This sensitivity to winter conditions occurs despite the fact that offspring are recruited  
427 in summer and both summer and winter demographic processes determine population fitness. As

428 whole-year, population-level effects of environmental change can be filtered by seasonal  
429 processes in the absence of density-dependent feedbacks, we highlight the need to assess such  
430 seasonal processes to gain a mechanistic understanding of population persistence (Paniw et al.,  
431 2019; Picó, de Kroon, & Retana, 2002).

432 Empirical studies have typically used annual models to demonstrate how positive  
433 demographic covariation can amplify environmental effects on population dynamics  
434 (Compagnoni et al., 2016); or how opposing demographic responses can buffer such effects  
435 (Gamelon et al., 2017; Reed et al., 2013). However, in marmots, as in numerous other  
436 populations (Bassar et al., 2016; Jenouvrier et al., 2018), seasonal demographic processes play an  
437 important role in life-cycle dynamics (Armitage, 2017). Our prospective perturbations show that  
438 changes in both mean winter and summer survival of reproductive adults have the strongest  
439 effect on population fitness, confirming the critical role of this life-cycle stage (Maldonado-  
440 Chaparro et al., 2018; Ozgul et al., 2009). At the same time, environmental fluctuations do not  
441 affect adult survival or other demographic processes throughout the year. That is, although the  
442 environment has been shown to drive particularly recruitment in numerous temperate species  
443 (e.g., Bonardi, Corlatti, Bragalanti, & Pedrotti, 2017; Nouvellet, Newman, Buesching, &  
444 Macdonald, 2013), such effects are not evident in marmots; here, environmental quality shows  
445 little impact on summer demography, including recruitment, and little covariation with winter  
446 demography. Instead, only the joint responses of demographic processes in winter are affected  
447 by environmental quality. The joint effects of the sensitivity of winter demography to  
448 environmental quality and the sensitivity of population fitness to winter demography then  
449 determine population persistence under environmental change.

450           The seasonal effects of environmental quality on population persistence must be  
451 understood in terms of the role of reproductive females in the marmot population (Ozgul et al.,  
452 2009). In our simulations, a good winter quality, which has previously been shown to have the  
453 strongest effect on individual survival (Armitage, Blumstein, & Woods, 2003), would, in  
454 particular, result in more reproductive females in the summer. In turn, summer survival and  
455 reproduction of these females are important to long- and short-term demography (Maldonado-  
456 Chaparro et al., 2018; Ozgul et al., 2009), but are not driven by environmental conditions. As is  
457 the case in other socially complex mammals (Morris et al., 2011), reproduction in yellow-bellied  
458 marmots is governed primarily by social interactions, in particular the behavior of dominant  
459 females (Armitage, 2010; Blumstein & Armitage, 1998). Even under optimal summer  
460 conditions, the reproductive output of the population may not be increased as dominant females  
461 suppress reproduction in younger subordinates and therefore regulate the size of colonies  
462 (Armitage, 1991). Dominant females, in addition, may skip reproduction themselves if they enter  
463 hibernation with a relatively low mass (Armitage, 2017). Thus, the necessity of meeting the  
464 physiological requirements of hibernation profoundly affects life-history traits of yellow-bellied  
465 marmots that are expressed during the active season. Here, an explicit seasonal population  
466 analysis allowed us to recognize a potentially important mechanism through which the  
467 environment filters demography: survival in or transition to the reproductive stage in a good  
468 winter can guarantee successful reproduction in summer, in addition to direct summer processes.

469           Unlike the direct effects of seasonal survival and reproduction, trait transitions between  
470 seasons had a smaller effect on annual population dynamics, even if winter mass changes were  
471 mediated by environmental quality. In this sense, the prospective perturbation analyses  
472 performed in our study are in agreement with retrospective analyses described by Maldonado-

473 Chaparro and colleagues (2018), who found a relatively small contribution of growth to past  
474 variation in annual population growth. These relatively small effects are likely due to the fact  
475 that marmots compensate for winter mass loss with increased growth in the summer, creating a  
476 zero net effect on annual trait change (Maldonado-Chaparro et al., 2017). Although the strength  
477 of compensatory effects may differ within seasons or among life-history stages (Monclús, Pang,  
478 & Blumstein, 2014), such effects are common in rodents and other species that have a short  
479 window for mass gain (Morgan & Metcalfe, 2001; Orizaola, Dahl, & Laurila, 2014), and  
480 highlight the advantages of assessing seasonal dynamics when studying population-level global-  
481 change effects (Bassar et al., 2016).

482 Under environmental change, the persistence of marmots was mostly affected by changes  
483 in mean environmental quality, whereas changes in the variance and temporal patterning of the  
484 mean showed little effects. This supports previous conclusions that yellow-bellied marmots are  
485 partly buffered against increases in environmental variation (Maldonado-Chaparro et al., 2018;  
486 Morris et al., 2008) or autocorrelation (Engen et al., 2013). Further support for demographic  
487 buffering comes from the fact that changes in the mean environmental quality most strongly  
488 affected those demographic processes to which the stochastic population growth rate was least  
489 sensitive. That is, yearlings gaining reproductive status in particular, albeit contributing relatively  
490 little to population dynamics, contributed strongly via environment-driven effects. It is well  
491 known that in species where vital rates of adults are relatively buffered, juveniles are much more  
492 sensitive to environmental variation (Gaillard & Yoccoz, 2003; Jenouvrier et al., 2018).

493 Although demographic buffering has been investigated in other animals (Bjørkvoll et al., 2016;  
494 Morris et al., 2008; Pfister, 1998; Rotella, Link, Chambert, Stauffer, & Garrott, 2012), we are, to  
495 the best of our knowledge, the first to show that it is likely to persist across the seasonal

496 environments and different masses for a high-altitude specialist; see Jenouvrier *et al.*, (2018) for  
497 similar analyses in a long-lived bird.

498         Our results emphasize that declines in environmental quality in one season alone can  
499 strongly affect annual population dynamics of a mammal highly adapted to seasonal  
500 environments and buffered from environmental variation. Therefore, positive demographic  
501 covariation under environmental change may threaten populations even if it affects demographic  
502 process to which the stochastic growth rate is least sensitive, *i.e.*, processes that are under low  
503 selection pressure (Coulson, Gaillard, & Festa-Bianchet, 2005; Iles, Rockwell, & Koons, 2019).  
504 Studies of global change ecology that focus on the effects of environmental factors on  
505 demographic processes considered to strongly affect both short- and long-term population  
506 dynamics may therefore miss the important role of seasonal demographic covariation. In  
507 addition, such seasonal mechanisms are potentially critical for conservation management (Paniw  
508 *et al.*, 2019) but would be missed by annual-step analyses where demographic processes are  
509 averaged across the entire year (Hostetler *et al.*, 2015).

510         Given the strong overlap of our results with previous findings and overall robust model  
511 performance, the factor analytic approach we used to quantify environment-driven covariation in  
512 demographic processes appears to be a promising alternative to approaches linking specific vital  
513 rates directly to environmental drivers (Evans & Holsinger, 2012; Hindle, Pilkington,  
514 Pemberton, & Childs, 2019; Hindle *et al.*, 2018). In the case of yellow-bellied marmots, where  
515 demographic rates were relatively easy to parameterize and the assumption of positive  
516 covariation holds in part due to a lack of density feedbacks, the factor analytic approach can be  
517 used effectively to assess population-level effects of perturbing a global measure of  
518 environmental quality. In cases where environment-demography relationships are more complex



519 and include negative demographic covariation (e.g., where trade-offs dominate), this approach  
520 may find limited applications. However, positive covariation of demographic patterns is common  
521 (Jongejans et al., 2010; Paniw et al., 2019); and, given the short time series of most demographic  
522 datasets (Salguero-Gómez et al., 2015; Salguero-Gómez et al., 2016) or little knowledge on the  
523 actual environmental drivers of population dynamics (Pol et al., 2016; Teller et al., 2016), the  
524 factor analytic approach can be particularly useful in comparative studies.

525         Most species inhabit seasonal environments. Under global environmental change, it may  
526 therefore be critical to understand how seasonality patterns mediate persistence of natural  
527 populations. Our analyses point to an important role of seasonal differences in demographic  
528 covariance in driving population responses to environmental change. Novel methods such as the  
529 factor analytic approach allow researchers to overcome some challenges associated with such  
530 mechanistic approaches, and we encourage more seasonal demographic analyses across different  
531 taxa.

## 532 **ACKNOWLEDGMENTS**

533 We thank the many volunteers and researchers of Rocky Mountain Biological Laboratory for  
534 collecting and providing us with the data on individual life histories of yellow-bellied marmots.  
535 M.P. was supported by an ERC Starting Grant (33785) and a Swiss National Science Foundation  
536 Grant (31003A\_182286) to A.O.; and by a Spanish Ministry of Economy and Competitiveness  
537 Juan de la Cierva-Formación grant FJCI-2017-32893; D.T.B. was supported by the National  
538 Geographic Society (grant # 8140-06), the UCLA Faculty Senate and Division of Life Sciences,  
539 a RMBL research fellowship, the National Science Foundation (IDBR-0754247, DEB-1119660  
540 and 1557130 to D.T.B.; DBI 0242960, 0731346, and 1226713 to the RMBL).

541

542 **AUTHOR CONTRIBUTIONS**

543 K.B.A., D.T.B., and M.O. led the long-term study and data collection; M.P., D.C., and A.O.  
544 conceived the ideas for the paper and designed the analyses; M.P. conducted the analyses with  
545 substantial help from J.M.; M.P. wrote the manuscript; all authors discussed the results and  
546 commented on the manuscript.

547

548 **DATA AVAILABILITY**

549 The datasets generated and analyzed during the current study as well as the R scripts to run all  
550 analyses are available in the *Dryad* repository, [PERSISTENT WEB LINK TO DATASETS].

551 **REFERENCES**

552 Armitage, K. B. (1984). Recruitment in yellow-bellied marmot populations: kinship, philopatry,  
553 and individual variability. In J. O. Murie & G. R. Michener (Eds.), *The Biology of Ground-*  
554 *Dwelling Squirrels* (pp. 377–403), Lincoln: Univ. Nebraska Press.

555 Armitage, K. B. (1991). Social and population dynamics of yellow-bellied marmots: results from  
556 long-term research. *Annual Review of Ecology and Systematics*, 22, 379–407.

557 Armitage, K. B. (2003). Observations on plant choice by foraging yellow-bellied marmots.  
558 *Oecologia Montana*, 12, 25–28.

559 Armitage, K. B. (2010). Individual fitness, social behavior, and population dynamics of yellow-  
560 bellied marmots. I. Billick & M.V. Price (Eds.) *The Ecology of Place: Contributions of*  
561 *Place-Based Research to Ecological Understanding* (pp. 132–154), Chicago: University of  
562 Chicago Press.

563 Armitage, K. B. (2014). *Marmot Biology: Sociality, Individual Fitness, and Population*  
564 *Dynamics*. Cambridge: Cambridge University Press.

- 565 Armitage, K. B. (2017). Hibernation as a major determinant of life-history traits in marmots.  
566 *Journal of Mammalogy*, 98, 321–331.
- 567 Armitage, K. B., Blumstein, D. T., & Woods, B. C. (2003). Energetics of hibernating yellow-  
568 bellied marmots (*Marmota flaviventris*). *Comparative Biochemistry and Physiology. Part A,*  
569 *Molecular & Integrative Physiology*, 134, 101–114.
- 570 Armitage, K. B., & Downhower, J. F. (1974). Demography of yellow-bellied marmot  
571 populations. *Ecology*, 55, 1233–1245.
- 572 Armitage, K. B., Downhower, J. F., & Svendsen, G. E. (1976). Seasonal changes in weights of  
573 marmots. *The American Midland Naturalist*, 96, 36–51.
- 574 Bassar, R. D., Letcher, B. H., Nislow, K. H., & Whiteley, A. R. (2016). Changes in seasonal  
575 climate outpace compensatory density-dependence in eastern brook trout. *Global Change*  
576 *Biology*, 22, 577–593.
- 577 Benton, T. G., Plaistow, S. J., & Coulson, T. N. (2006). Complex population dynamics and  
578 complex causation: devils, details and demography. *Proceedings. Biological Sciences*, 273,  
579 1173–1181.
- 580 Bjørkvoll, E., Lee, A. M., Grøtan, V., Saether, B.-E., Stien, A., Engen, S., Albon, S., Loe, L.E.,  
581 & Hansen, B. B. (2016). Demographic buffering of life histories? Implications of the choice  
582 of measurement scale. *Ecology*, 97, 40–47.
- 583 Blumstein, D. T., & Armitage, K. B. (1998). Life history consequences of social complexity a  
584 comparative study of ground-dwelling sciurids. *Behavioral Ecology*, 9, 8-19.
- 585 Bonardi, A., Corlatti, L., Bragalanti, N., & Pedrotti, L. (2017). The role of weather and density  
586 dependence on population dynamics of Alpine-dwelling red deer. *Integrative Zoology*, 12,  
587 61-76.

- 588 Campos, F. A., Morris, W. F., Alberts, S. C., Altmann, J., Brockman, D. K., Cords, M., Pusey,  
589 A., Stoinski, T. S., Strier, K. B., & Fedigan, L. M. (2017). Does climate variability influence  
590 the demography of wild primates? Evidence from long-term life-history data in seven  
591 species. *Global Change Biology*, 23, 4907–4921.
- 592 Caswell, H. (2001). *Matrix Population Models*. Sunderland: Sinauer.
- 593 Childs, D. Z., Coulson, T. N., Pemberton, J. M., Clutton-Brock, T. H., & Rees, M. (2011).  
594 Predicting trait values and measuring selection in complex life histories: reproductive  
595 allocation decisions in Soay sheep. *Ecology Letters*, 14, 985–992.
- 596 Compagnoni, A., Bibian, A. J., Ochocki, B. M., Rogers, H. S., Schultz, E. L., Sneek, M. E.,  
597 Elderd, B. D., Iler, A. M., Inouye, D. W., Jacquemin, H., & Miller, T. E. X. (2016). The  
598 effect of demographic correlations on the stochastic population dynamics of perennial  
599 plants. *Ecological Monographs*, 86, 480–494.
- 600 Connell, S. D., & Ghedini, G. (2015). Resisting regime-shifts: the stabilising effect of  
601 compensatory processes. *Trends in Ecology & Evolution*, 30, 513–515.
- 602 Coulson, T., Gaillard, J.-M., & Festa-Bianchet, M. (2005). Decomposing the variation in  
603 population growth into contributions from multiple demographic rates. *The Journal of*  
604 *Animal Ecology*, 74, 789–801.
- 605 Easterling, M. R., Ellner, S. P., & Dixon, P. M. (2000). Size-specific sensitivity: applying a new  
606 structured population model. *Ecology*, 81, 694–708.
- 607 Ehrlén, J., & Morris, W. F. (2015). Predicting changes in the distribution and abundance of  
608 species under environmental change. *Ecology Letters*, 18, 303–314.
- 609 Ehrlén, J., Morris, W. F., von Euler, T., & Dahlgren, J. P. (2016). Advancing environmentally  
610 explicit structured population models of plants. *The Journal of Ecology*, 104, 292–305.

- 611 Ellner, S. P., Childs, D. Z., & Rees, M. (2016). *Data-driven Modelling of Structured*  
612 *Populations: A Practical Guide to the Integral Projection Model*. Springer.
- 613 Engen, S., Sæther, B.-E., Armitage, K. B., Blumstein, D. T., Clutton-Brock, T. H., Dobson, F. S.,  
614 Festa-Bianchet, M., Oli, M. K., & Ozgul, A. (2013). Estimating the effect of temporally  
615 autocorrelated environments on the demography of density-independent age-structured  
616 populations. *Methods in Ecology and Evolution*, 4, 573–584.
- 617 Evans, M. E. K., & Holsinger, K. E. (2012). Estimating covariation between vital rates: a  
618 simulation study of connected vs. separate generalized linear mixed models (GLMMs).  
619 *Theoretical Population Biology*, 82, 299–306.
- 620 Frase, B. A., & Hoffmann, R. S. (1980). *Marmota flaviventris*. *Mammalian Species*, 135, 1–8.
- 621 Gaillard, J.-M., & Yoccoz, N. G. (2003). Temporal variation in survival of mammals: A case of  
622 environmental canalization? *Ecology*, 84, 3294–3306.
- 623 Gamelon, M., Grøtan, V., Nilsson, A. L. K., Engen, S., Hurrell, J. W., Jerstad, K., Phillips, A. S.,  
624 Røstad, O. W., Slagsvold, T., Walseng, B., Steneth, N. C., & Sæther, B.-E. (2017).  
625 Interactions between demography and environmental effects are important determinants of  
626 population dynamics. *Science Advances*, 3, e1602298.
- 627 Haridas, C. V., & Tuljapurkar, S. (2005). Elasticities in variable environments: properties and  
628 implications. *The American Naturalist*, 166, 481–495.
- 629 Harrison, X. A., Blount, J. D., Inger, R., Norris, R. D., & Bearhop, S. (2010). Carry-over effects  
630 as drivers of fitness differences in animals. *The Journal of Animal Ecology*, 80, 4–18.
- 631 Hindle, B. J., Pilkington, J. G., Pemberton, J. M., & Childs, D. Z. (2019). Cumulative weather  
632 effects can impact across the whole life cycle. *Global Change Biology*, in press.
- 633 Hindle, B. J., Rees, M., Sheppard, A. W., Quintana-Ascencio, P. F., Menges, E. S., & Childs, D.

- 634 Z. (2018). Exploring population responses to environmental change when there is never  
635 enough data: a factor analytic approach. *Methods in Ecology and Evolution*, 147, 115.
- 636 Hostetler, J. A., Sillett, T. S., & Marra, P. P. (2015). Full-annual-cycle population models for  
637 migratory birds. *The Auk*, 132, 433–449.
- 638 Iles, D. T., Rockwell, R. F., & Koons, D. N. (2019). Shifting vital rate correlations alter  
639 predicted population responses to increasingly variable environments. *The American*  
640 *Naturalist*, E57–E64.
- 641 Inouye, D. W., Barr, B., Armitage, K. B., & Inouye, B. D. (2000). Climate change is affecting  
642 altitudinal migrants and hibernating species. *Proceedings of the National Academy of*  
643 *Sciences of the United States of America*, 97, 1630–1633.
- 644 Jenouvrier, S., Desprez, M., Fay, R., Barbraud, C., Weimerskirch, H., Delord, K., & Caswell, H.  
645 (2018). Climate change and functional traits affect population dynamics of a long-lived  
646 seabird. *The Journal of Animal Ecology*, 87, 906–920.
- 647 Jenouvrier, S., Holland, M., Stroeve, J., Barbraud, C., Weimerskirch, H., Serreze, M., & Caswell,  
648 H. (2012). Effects of climate change on an emperor penguin population: analysis of coupled  
649 demographic and climate models. *Global Change Biology*, 18, 2756–2770.
- 650 Jongejans, E., de Kroon, H., Tuljapurkar, S., & Shea, K. (2010). Plant populations track rather  
651 than buffer climate fluctuations. *Ecology Letters*, 13, 736–743.
- 652 Knops, J. M. H., Koenig, W. D., & Carmen, W. J. (2007). Negative correlation does not imply a  
653 tradeoff between growth and reproduction in California oaks. *Proceedings of the National*  
654 *Academy of Sciences of the United States of America*, 104, 16982–16985.
- 655 Lawson, C. R., Vindenes, Y., Bailey, L., & van de Pol, M. (2015). Environmental variation and  
656 population responses to global change. *Ecology Letters*, 18, 724–736.

- 657 Lenihan, C., & Vuren, D. V. (1996). Growth and survival of juvenile yellow-bellied marmots  
658 (*Marmota flaviventris*). *Canadian Journal of Zoology*, 74, 297–302.
- 659 Maldonado-Chaparro, A. A., Blumstein, D. T., Armitage, K. B., & Childs, D. Z. (2018).  
660 Transient LTRE analysis reveals the demographic and trait-mediated processes that buffer  
661 population growth. *Ecology Letters*, 23, 1353.
- 662 Maldonado-Chaparro, A. A., Read, D. W., & Blumstein, D. T. (2017). Can individual variation  
663 in phenotypic plasticity enhance population viability? *Ecological Modelling*, 352, 19–30.
- 664 Marra, P. P., Cohen, E. B., Loss, S. R., Rutter, J. E., & Tonra, C. M. (2015). A call for full  
665 annual cycle research in animal ecology. *Biology Letters*, 11, 20150552.
- 666 Merow, C., Dahlgren, J. P., Metcalf, C. J. E., Childs, D. Z., Evans, M. E. K., Jongejans, E.,  
667 Record, S., Rees, M., Salguero-Gómez, R., & McMahon, S. M. (2014). Advancing  
668 population ecology with integral projection models: a practical guide. *Methods in Ecology  
669 and Evolution*, 5, 99–110.
- 670 Monclús, R., Pang, B., & Blumstein, D. T. (2014). Yellow-bellied marmots do not compensate  
671 for a late start: the role of maternal allocation in shaping life-history trajectories.  
672 *Evolutionary Ecology*, 28, 721–733.
- 673 Morgan, I. J., & Metcalfe, N. B. (2001). Deferred costs of compensatory growth after autumnal  
674 food shortage in juvenile salmon. *Proceedings. Biological Sciences*, 268, 295–301.
- 675 Morris, W. F., Altmann, J., Brockman, D. K., Cords, M., Fedigan, L. M., Pusey, A. E., Stoinski,  
676 T. S., Bronikowski, A. M., Alberts, S. C., & Strier, K. B. (2011). Low demographic  
677 variability in wild primate populations: fitness impacts of variation, covariation, and serial  
678 correlation in vital rates. *The American Naturalist*, 177, E14–E28.
- 679 Morris, W. F., Pfister, C. A., Tuljapurkar, S., Haridas, C. V., Boggs, C. L., Boyce, M. S., Bruna,

- 680 E. M., Church, D. R., Coulson, T., Doak, D. F., Forsyth, S., Gaillard, J.-M., Horvitz, C. C.,  
681 Kalisz, S., Kendall, B. E., Knight, T. M., Lee, C. T., & Menges, E. S. (2008). Longevity can  
682 buffer plant and animal populations against changing climatic variability. *Ecology*, 89, 19–  
683 25.
- 684 Nouvellet, P., Newman, C., Buesching, C. D., & Macdonald, D. W. (2013). A multi-metric  
685 approach to investigate the effects of weather conditions on the demographic of a terrestrial  
686 mammal, the european badger (*Meles meles*). *PloS One*, 8, e68116.
- 687 Oli, M. K., & Armitage, K. B. (2004). Yellow-bellied marmot population dynamics:  
688 demographic mechanisms of growth and decline. *Ecology*, 85, 2446–2455.
- 689 Orizaola, G., Dahl, E., & Laurila, A. (2014). Compensatory growth strategies are affected by the  
690 strength of environmental time constraints in anuran larvae. *Oecologia*, 174, 131–137.
- 691 Ozgul, A., Childs, D. Z., Oli, M. K., Armitage, K. B., & Blumstein, D. T. (2010). Coupled  
692 dynamics of body mass and population growth in response to environmental change. *Nature*,  
693 466, 482–485.
- 694 Ozgul, A., Oli, M. K., & Armitage, K. B. (2009). Influence of local demography on asymptotic  
695 and transient dynamics of a yellow-bellied marmot metapopulation. *The American*  
696 *Naturalist*, 173, 517–530.
- 697 Ozgul, A., Oli, M. K., Olson, L. E., Blumstein, D. T., & Armitage, K. B. (2007). Spatiotemporal  
698 variation in reproductive parameters of yellow-bellied marmots. *Oecologia*, 154, 95–106.
- 699 Paniw, M., Maag, N., Cozzi, G., Clutton-Brock, T., & Ozgul, A. (2019). Life history responses  
700 of meerkats to seasonal changes in extreme environments. *Science*, 363, 631–635.
- 701 Paniw, M., Ozgul, A., & Salguero-Gómez, R. (2018). Interactive life-history traits predict  
702 sensitivity of plants and animals to temporal autocorrelation. *Ecology Letters*, 21, 275–286.



- 703 Paniw, M., Quintana-Ascencio, P. F., Ojeda, F., & Salguero-Gómez, R. (2017a). Accounting for  
704 uncertainty in dormant life stages in stochastic demographic models. *Oikos*, 126, 900–909.
- 705 Paniw, M., Quintana-Ascencio, P. F., Ojeda, F., & Salguero-Gómez, R. (2017b). Interacting  
706 livestock and fire may both threaten and increase viability of a fire-adapted Mediterranean  
707 carnivorous plant. *The Journal of Applied Ecology*, 54, 1884–1894.
- 708 Pfister, C. A. (1998). Patterns of variance in stage-structured populations: evolutionary  
709 predictions and ecological implications. *Proceedings of the National Academy of Sciences of*  
710 *the United States of America*, 95, 213–218.
- 711 Picó, F. X., de Kroon, H., & Retana, J. (2002). An extended flowering and fruiting season has  
712 few demographic effects in a Mediterranean perennial herb. *Ecology*, 83, 1991–2004.
- 713 Pol, M., Bailey, L. D., McLean, N., Rijdsdijk, L., Lawson, C. R., & Brouwer, L. (2016).  
714 Identifying the best climatic predictors in ecology and evolution. *Methods in Ecology and*  
715 *Evolution*, 7, 1246–1257.
- 716 Reed, T. E., Grøtan, V., Jenouvrier, S., Sæther, B.-E., & Visser, M. E. (2013). Population growth  
717 in a wild bird is buffered against phenological mismatch. *Science*, 340, 488–491.
- 718 Rees, M., & Ellner, S. P. (2009). Integral projection models for populations in temporally  
719 varying environments. *Ecological Monographs*, 79, 575–594.
- 720 Ripley, B. J., & Caswell, H. (2006). Recruitment variability and stochastic population growth of  
721 the soft-shell clam, *Mya arenaria*. *Ecological Modelling*, 193, 517–530.
- 722 Robert, A., Bolton, M., Jiguet, F., & Bried, J. (2015). The survival–reproduction association  
723 becomes stronger when conditions are good. *Proceedings. Biological Sciences*, 282,  
724 20151529.
- 725 Rotella, J. J., Link, W. A., Chambert, T., Stauffer, G. E., & Garrott, R. A. (2012). Evaluating the

- 726 demographic buffering hypothesis with vital rates estimated for Weddell seals from 30 years  
727 of mark-recapture data. *The Journal of Animal Ecology*, 81, 162–173.
- 728 Ruf, T., Bieber, C., Arnold, W., & Millesi, E. (2012). *Living in a Seasonal World:*  
729 *Thermoregulatory and Metabolic Adaptations*. Springer Science & Business Media.
- 730 Rushing, C. S., Hostetler, J. A., Sillett, T. S., Marra, P. P., Rotenberg, J. A., & Ryder, T. B.  
731 (2017). Spatial and temporal drivers of avian population dynamics across the annual cycle.  
732 *Ecology*, 98, 2837–2850.
- 733 Salguero-Gómez, R., Jones, O. R., & Archer, C. R., et al. (2015). The COMPADRE Plant Matrix  
734 Database: an open online repository for plant demography. *Journal of Ecology*, 103, 202-  
735 218.
- 736 Salguero-Gómez, R., Jones, O. R., Archer, C. R., et al. (2016). COMADRE: a global data base  
737 of animal demography. *The Journal of Animal Ecology*, 85, 371–384.
- 738 Schwartz, O. A., & Armitage, K. B. (2002). Correlations between weather factors and life-  
739 history traits of yellow-bellied marmots. *Proceedings of the 3rd International Marmot*  
740 *Conference, Cheboksary, Russia*.
- 741 Schwartz, O. A., & Armitage, K. B. (2005). Weather influences on demography of the yellow-  
742 bellied marmot (*Marmota flaviventris*). *Journal of Zoology*, 265, 73–79.
- 743 Schwartz, O. A., Armitage, K. B., & Van Vuren, D. (1998). A 32-year demography of yellow-  
744 bellied marmots (*Marmota flaviventris*). *Journal of Zoology*, 246, 337–346.
- 745 Simmonds, E. G., & Coulson, T. (2015). Analysis of phenotypic change in relation to climatic  
746 drivers in a population of Soay sheep *Ovis aries*. *Oikos*, 124, 543–552.
- 747 Teller, B. J., Adler, P. B., Edwards, C. B., Hooker, G., & Ellner, S. P. (2016). Linking  
748 demography with drivers: climate and competition. *Methods in Ecology and Evolution*, 7,

- 749 171–183.
- 750 Töpper, J. P., Meineri, E., Olsen, S. L., Rydgren, K., Skarpaas, O., & Vandvik, V. (2018). The  
751 devil is in the detail: non-additive and context-dependent plant population responses to  
752 increasing temperature and precipitation. *Global Change Biology*, 24, 4657–4666.
- 753 Van de Pol, M., Vindenes, Y., Sæther, B.-E., Engen, S., Ens, B. J., Oosterbeek, K., & Tinbergen,  
754 J. M. (2010). Effects of climate change and variability on population dynamics in a long-  
755 lived shorebird. *Ecology*, 91, 1192–1204.
- 756 Van Vuren, D., & Armitage, K. B. (1994). Survival of dispersing and philopatric yellow-bellied  
757 marmots: what is the cost of dispersal? *Oikos*, 69, 179–181.
- 758 Varpe, Ø. (2017). Life history adaptations to seasonality. *Integrative and Comparative Biology*,  
759 57, 943–960.
- 760 Vilellas, J., Doak, D. F., García, M. B., & Morris, W. F. (2015). Demographic compensation  
761 among populations: what is it, how does it arise and what are its implications? *Ecology*  
762 *Letters*, 18, 1139–1152.
- 763 Van Vuren, D., & Armitage, K. B. (1991). Duration of snow cover and its influence on life-  
764 history variation in yellow-bellied marmots. *Canadian Journal of Zoology*, 69, 1755–1758.
- 765 Williams, J. L., Miller, T. E. X., & Ellner, S. P. (2012). Avoiding unintentional eviction from  
766 integral projection models. *Ecology*, 93, 2008–2014.
- 767 Woodroffe, R., Groom, R., & McNutt, J. W. (2017). Hot dogs: High ambient temperatures  
768 impact reproductive success in a tropical carnivore. *The Journal of Animal Ecology*, 86,  
769 1329–1338.
- 770 Williams J. L., Miller T. E. X. & Ellner S. P. (2012). Avoiding unintentional eviction from  
771 integral projection models. *Ecology*, 93, 2008–2014.
